# Supplementary material for: COVID-19 Vaccine Acceptability and Its Determinants in Mozambique: An Online Survey
Source: MDPI journal article supplement (doi:10.3390/vaccines9080828), 2021-07-27
Supplement: s1 [file s1]

# Moçambique vacinação COVID-19

## IDENTIFICAÇÃO DO PARTICIPANTE

A COVID-19 é uma doença respiratória aguda que se manifesta por um quadro de gripe na fase ligeira mas pode tornar-se grave com dificuldade respiratória e risco de morte. Este é um problema de saúde mundial que se propagou para Moçambique. Neste momento em Moçambique, registrou-se 62.520 casos e 693 óbitos de COVID-19.

A transmissão de COVID-19 ocorre entre humanos por via respiratória, objectos contaminados e contacto físico directo com pessoas infectadas.

As medidas implementadas para prevenção de COVID-19 incluem a combinação: distanciamento físico entre as pessoas, uso de mascaras faciais, lavagem e/ou desinfecção frequente das mãos e objectos, e actualmente a vacinação contra a COVID-19. Com este questionário pretendemos entender a aceitabilidade da vacina contra COVID-19 em Moçambique.

Convidamos os voluntários a preencher as suas opiniões neste questionário o mais fielmente possível; Em geral responder ao questionário leva em media 10 a 15 minutos.

A sua participação deve ser voluntária. O participante deve ter idade igual ou superior a 18 anos. Você pode desistir de participar a qualquer momento, sem qualquer represálias. Seus dados serão anónimos e tratados confidencialmente. Não prevemos ocorrência de riscos ao participar desta pesquisa, e nem benefícios individuais; os resultados ajudarão a evidenciar a aceitação e preocupações da população com relação a vacinação contra COVID-19. Precisando de mais informações poderá contactar os pesquisadores e consultar as nossas medidas de confidencialidade no site [www.ICPCovid.com](http://www.ICPCovid.com).

Caso tenha qualquer dúvida relacionada a este inquérito, por favor pode contactar a equipa de pesquisa, através do email: [psistemasdesaude@gmail.com](mailto:psistemasdesaude@gmail.com). Contactos: 822718644 (Comité Institucional de Bioética para a Saúde) ou 877653701 (Investigadora Principal).

Q: Expressão de Consentimento: (\*)

Type: choice

A: one of the following:

|     |    |                              |
|-----|----|------------------------------|
| Sim | => | <i>Aceito participar</i>     |
| Não | => | <i>Não Aceito participar</i> |

## INFORMAÇÃO DO INTREVISTADO

Q: Província (\*)

Type: choice

A: one of the following:

|               |    |                        |
|---------------|----|------------------------|
| Gaza          | => | <i>Gaza</i>            |
| Inhambane     | => | <i>Inhambane</i>       |
| Cabo_Delgado  | => | <i>Cabo Delgado</i>    |
| Manica        | => | <i>Manica</i>          |
| Maputo_cidade | => | <i>Maputo (cidade)</i> |
| Maputo        | => | <i>Maputo</i>          |
| Nampula       | => | <i>Nampula</i>         |
| Niassa        | => | <i>Niassa</i>          |
| Sofala        | => | <i>Sofala</i>          |
| Tete          | => | <i>Tete</i>            |

|          |    |                 |
|----------|----|-----------------|
| Zambézia | => | <i>Zambézia</i> |
|----------|----|-----------------|

Q: Gaza (\*)

Type: choice

A: one of the following:

|               |    |                      |
|---------------|----|----------------------|
| Bilene        | => | <i>Bilene</i>        |
| Chibuto       | => | <i>Chibuto</i>       |
| Chicualacuala | => | <i>Chicualacuala</i> |
| Chigubo       | => | <i>Chigubo</i>       |
| Chockwe       | => | <i>Chockwe</i>       |
| Chongoene     | => | <i>Chongoene</i>     |
| Guijá         | => | <i>Guijá</i>         |
| Limpopo       | => | <i>Limpopo</i>       |
| Mabalane      | => | <i>Mabalane</i>      |
| Mandlakazi    | => | <i>Mandlakazi</i>    |
| Mapai         | => | <i>Mapai</i>         |
| Massangena    | => | <i>Massangena</i>    |
| Massingir     | => | <i>Massingir</i>     |
| Xai-Xai       | => | <i>Xai-Xai</i>       |

Q: Inhambane (\*)

Type: choice

A: one of the following:

|            |    |                   |
|------------|----|-------------------|
| Inhambane  | => | <i>Inhambane</i>  |
| Funhalouro | => | <i>Funhalouro</i> |
| Govuro     | => | <i>Govuro</i>     |
| Homoine    | => | <i>Homoine</i>    |
| Inharrime  | => | <i>Inharrime</i>  |
| Inhassoro  | => | <i>Inhassoro</i>  |
| Jangamo    | => | <i>Jangamo</i>    |
| Mabote     | => | <i>Mabote</i>     |
| Massinga   | => | <i>Massinga</i>   |
| Maxixe     | => | <i>Maxixe</i>     |
| Morrumbene | => | <i>Morrumbene</i> |
| Panda      | => | <i>Panda</i>      |
| Vilanculos | => | <i>Vilanculos</i> |
| Zavala     | => | <i>Zavala</i>     |

Q: Cabo Delgado (\*)

Type: choice

A: one of the following:

|         |    |                |
|---------|----|----------------|
| Ancuabe | => | <i>Ancuabe</i> |
| Balama  | => | <i>Balama</i>  |

|                   |    |                          |
|-------------------|----|--------------------------|
| Chiure            | => | <i>Chiure</i>            |
| Ibo               | => | <i>Ibo</i>               |
| Macomia           | => | <i>Macomia</i>           |
| Mecufi            | => | <i>Mecufi</i>            |
| Meluco            | => | <i>Meluco</i>            |
| Metuge            | => | <i>Metuge</i>            |
| Mocimboa_da_Praia | => | <i>Mocimboa da Praia</i> |
| Montepuez         | => | <i>Montepuez</i>         |
| Mueda             | => | <i>Mueda</i>             |
| Muidumbe          | => | <i>Muidumbe</i>          |
| Namuno            | => | <i>Namuno</i>            |
| Nangade           | => | <i>Nangade</i>           |
| Palma             | => | <i>Palma</i>             |
| Pemba             | => | <i>Pemba</i>             |
| Quissanga         | => | <i>Quissanga</i>         |

**Q: Manica (\*)**

Type: choice

A: one of the following:

|             |    |                    |
|-------------|----|--------------------|
| Manica      | => | <i>Manica</i>      |
| Bárue       | => | <i>Bárue</i>       |
| Chimoio     | => | <i>Chimoio</i>     |
| Gondola     | => | <i>Gondola</i>     |
| Guro        | => | <i>Guro</i>        |
| Macate      | => | <i>Macate</i>      |
| Machaze     | => | <i>Machaze</i>     |
| Macossa     | => | <i>Macossa</i>     |
| Mossurize   | => | <i>Mossurize</i>   |
| Sussundenga | => | <i>Sussundenga</i> |
| Tambara     | => | <i>Tambara</i>     |
| Vanduzi     | => | <i>Vanduzi</i>     |

**Q: Maputo Cidade (\*)**

Type: choice

A: one of the following:

|             |    |                    |
|-------------|----|--------------------|
| Kamavota    | => | <i>Kamavota</i>    |
| Kamaxakeni  | => | <i>Kamaxakeni</i>  |
| Kamubukwane | => | <i>Kamubukwane</i> |
| Kanyaka     | => | <i>Kanyaka</i>     |
| Katembe     | => | <i>Katembe</i>     |
| Khampfumo   | => | <i>Khampfumo</i>   |
| Nlhamankulo | => | <i>Nlhamankulo</i> |

Q: Maputo (\*)

Type: choice

A: one of the following:

|            |    |                   |
|------------|----|-------------------|
| Boane      | => | <i>Boane</i>      |
| Magude     | => | <i>Magude</i>     |
| Manhiça    | => | <i>Manhiça</i>    |
| Marracuene | => | <i>Marracuene</i> |
| Matola     | => | <i>Matola</i>     |
| Matutine   | => | <i>Matutine</i>   |
| Moamba     | => | <i>Moamba</i>     |
| Namaacha   | => | <i>Namaacha</i>   |

Q: Nampula (\*)

Type: choice

A: one of the following:

|                    |    |                           |
|--------------------|----|---------------------------|
| Angoche            | => | <i>Angoche</i>            |
| Nampula            | => | <i>Nampula</i>            |
| Erati              | => | <i>Erati</i>              |
| Ilha_de_Moçambique | => | <i>Ilha de Moçambique</i> |
| Lalaua             | => | <i>Lalaua</i>             |
| Larde              | => | <i>Larde</i>              |
| Liupo              | => | <i>Liupo</i>              |
| Malema             | => | <i>Malema</i>             |
| Meconta            | => | <i>Meconta</i>            |
| Mecuburi           | => | <i>Mecuburi</i>           |
| Memba              | => | <i>Memba</i>              |
| Mogincual          | => | <i>Mogincual</i>          |
| Mogovolas          | => | <i>Mogovolas</i>          |
| Moma               | => | <i>Moma</i>               |
| Monapo             | => | <i>Monapo</i>             |
| Mossuril           | => | <i>Mossuril</i>           |
| Muecate            | => | <i>Muecate</i>            |
| Murupula           | => | <i>Murupula</i>           |
| Nacala_Porto       | => | <i>Nacala Porto</i>       |
| Nacala-a-velha     | => | <i>Nacala-a-velha</i>     |
| Nacarua            | => | <i>Nacarua</i>            |
| Rapale             | => | <i>Rapale</i>             |
| Ribaue             | => | <i>Ribaue</i>             |

Q: Niassa (\*)

Type: choice

A: one of the following:

|            |    |                   |
|------------|----|-------------------|
| Chimbonila | => | <i>Chimbonila</i> |
|------------|----|-------------------|

|            |    |                           |
|------------|----|---------------------------|
| Cuamba     | => | <i>Cuamba</i>             |
| Lago       | => | <i>Lago</i>               |
| Majune     | => | <i>Ilha de Moçambique</i> |
| Mandimba   | => | <i>Mandimba</i>           |
| Marrupa    | => | <i>Marrupa</i>            |
| Maua       | => | <i>Maua</i>               |
| Mavago     | => | <i>Mavago</i>             |
| Mecanhelas | => | <i>Mecanhelas</i>         |
| Mecula     | => | <i>Mecula</i>             |
| Metarica   | => | <i>Metarica</i>           |
| Mueda      | => | <i>Mueda</i>              |
| Muembe     | => | <i>Muembe</i>             |
| Ngauma     | => | <i>Ngauma</i>             |
| Nipepe     | => | <i>Nipepe</i>             |
| Sanga      | => | <i>Sanga</i>              |

**Q: Sofala (\*)**

Type: choice

A: one of the following:

|            |    |                   |
|------------|----|-------------------|
| Beira      | => | <i>Beira</i>      |
| Buzi       | => | <i>Buzi</i>       |
| Caia       | => | <i>Caia</i>       |
| Chemba     | => | <i>Chemba</i>     |
| Cheringoma | => | <i>Cheringoma</i> |
| Chibabava  | => | <i>Chibabava</i>  |
| Dondo      | => | <i>Dondo</i>      |
| Gorongosa  | => | <i>Gorongosa</i>  |
| Machanga   | => | <i>Machanga</i>   |
| Maringue   | => | <i>Maringue</i>   |
| Marromeu   | => | <i>Marromeu</i>   |
| Muanza     | => | <i>Muanza</i>     |
| Nhamatanda | => | <i>Nhamatanda</i> |

**Q: Tete (\*)**

Type: choice

A: one of the following:

|              |    |                         |
|--------------|----|-------------------------|
| Tete         | => | <i>Tete</i>             |
| Angónia      | => | <i>Angónia</i>          |
| Cahora_Bassa | => | <i>Cahora<br/>Bassa</i> |
| Changara     | => | <i>Changara</i>         |
| Chifunde     | => | <i>Chifunde</i>         |
| Chiuta       | => | <i>Chiuta</i>           |
| Doa          | => | <i>Doa</i>              |

|          |    |                 |
|----------|----|-----------------|
| Macanga  | => | <i>Macanga</i>  |
| Magoé    | => | <i>Magoé</i>    |
| Marara   | => | <i>Marara</i>   |
| Marávia  | => | <i>Marávia</i>  |
| Moatize  | => | <i>Moatize</i>  |
| Mutarara | => | <i>Mutarara</i> |
| Tsangano | => | <i>Tsangano</i> |
| Zumbo    | => | <i>Zumbo</i>    |

**Q: Zambezia (\*)**

Type: choice

A: one of the following:

|                  |    |                         |
|------------------|----|-------------------------|
| Alto_Molocue     | => | <i>Alto Molocue</i>     |
| Chinde           | => | <i>Chinde</i>           |
| Derre            | => | <i>Derre</i>            |
| Gilé             | => | <i>Gilé</i>             |
| Gurué            | => | <i>Gurué</i>            |
| Ile              | => | <i>Ile</i>              |
| Inhassunge       | => | <i>Inhassunge</i>       |
| Luabo            | => | <i>Luabo</i>            |
| Lugela           | => | <i>Lugela</i>           |
| Maganja_da_Costa | => | <i>Maganja da Costa</i> |
| Milange          | => | <i>Milange</i>          |
| Mocuba           | => | <i>Mocuba</i>           |
| Mocubela         | => | <i>Mocubela</i>         |
| Molumbo          | => | <i>Molumbo</i>          |
| Mopeia           | => | <i>Mopeia</i>           |
| Morrumbala       | => | <i>Morrumbala</i>       |
| Mulevala         | => | <i>Mulevala</i>         |
| Namacurra        | => | <i>Namacurra</i>        |
| Namarroi         | => | <i>Namarroi</i>         |
| Nicoadala        | => | <i>Nicoadala</i>        |
| Pebane           | => | <i>Pebane</i>           |
| Quelimane        | => | <i>Quelimane</i>        |

**Q: É profissional de saúde? (\*)**

Type: choice

A: one of the following:

|     |    |            |
|-----|----|------------|
| Sim | => | <i>Sim</i> |
| Não | => | <i>Não</i> |

**Q: Em que tipo de instituição trabalha? (\*)**

Type: choice

A: one of the following:

|                         |    |                                |
|-------------------------|----|--------------------------------|
| Misau                   | => | <i>Misau</i>                   |
| DPS/SPAS/DDS            | => | <i>DPS/SPAS/DDS</i>            |
| Instituição de pesquisa | => | <i>Instituição de pesquisa</i> |
| Instituição de formação | => | <i>Instituição de formação</i> |
| ONG/OSC                 | => | <i>ONG/OSC</i>                 |
| Hospital Provincial     | => | <i>Hospital Provincial</i>     |
| Outro                   | => | <i>Outro</i>                   |
| Unidade Sanitária       | => | <i>Unidade Sanitária</i>       |

**Q: Tipo de Unidade Sanitária**

Type: choice

A: one of the following:

|           |    |                               |
|-----------|----|-------------------------------|
| CS_Rural  | => | <i>Centro de Saúde Rural</i>  |
| CS_Urbano | => | <i>Centro de Saúde Urbano</i> |
| HD        | => | <i>Hospital Distrital</i>     |
| HG        | => | <i>Hospital Geral</i>         |
| HR        | => | <i>Hospital Rural</i>         |
| HP        | => | <i>Hospital Provincial</i>    |
| HC        | => | <i>Hospital Central</i>       |

Visible if

|                                      |                              |
|--------------------------------------|------------------------------|
| Q:                                   | A:                           |
| É profissional de saúde?             | - value => Sim               |
| Em que tipo de instituição trabalha? | - value => Unidade Sanitária |

**Q: Formação**

Type: choice

A: one of the following:

|                                    |    |                                           |
|------------------------------------|----|-------------------------------------------|
| Enfermagem                         | => | <i>Enfermagem</i>                         |
| Médico(a)                          | => | <i>Médico(a)</i>                          |
| Agente_de_Serviço                  | => | <i>Agente de Serviço</i>                  |
| Técnico_de_Saúde                   | => | <i>Técnico de Saúde</i>                   |
| Funcionário_da_área_administrativa | => | <i>Funcionário da área administrativa</i> |
| Outra                              | => | <i>Outra, especificar</i>                 |

**Q: Especifique (\*)**

Type:  
text

A: text input

Visible if

|          |                     |
|----------|---------------------|
| Q:       | A:                  |
| Formação | - value =><br>Outra |

Q: Função que ocupa

Type: choice

A: one of the following:

|                     |    |                            |
|---------------------|----|----------------------------|
| Atendimento_clinico | => | <i>Atendimento clinico</i> |
| Laboratorial        | => | <i>Laboratorial</i>        |
| Saúde_Publica       | => | <i>Saúde Publica</i>       |
| Área_administrativa | => | <i>Área administrativa</i> |
| Agentes_de_Serviços | => | <i>Agentes de Serviços</i> |
| Pesquisador         | => | <i>Pesquisador</i>         |
| Outra               | => | <i>Outra</i>               |

Q: Especificar (\*)

Type:  
text

A: text input

Visible if

|                  |                     |
|------------------|---------------------|
| Q:               | A:                  |
| Função que ocupa | - value =><br>Outra |

Q: A que grupo pertence (\*)

Type: choice

A: one of the following:

|                |    |                                         |
|----------------|----|-----------------------------------------|
| Doente_crónico | => | <i>Doente crónico</i>                   |
| Gestante       | => | <i>Gestante</i>                         |
| Forças_Armadas | => | <i>Forças de defesa e segurança</i>     |
| Idoso          | => | <i>Idoso vivendo em lar para idosos</i> |
| Professores    | => | <i>Professores</i>                      |
| Nenhum         | => | <i>Nenhum</i>                           |

Q: Bairro de residência (\*)

Type:  
text

A: text input

Q: Zona de residência: (\*)



Type: choice

A: one of the following:

|                 |    |                        |
|-----------------|----|------------------------|
| Zona_Urbana     | => | <i>Zona Urbana</i>     |
| Zona_Rural      | => | <i>Zona Rural</i>      |
| Zona_Periurbana | => | <i>Zona Periurbana</i> |
| Vila            | => | <i>Vila</i>            |
| Aldeia          | => | <i>Aldeia</i>          |

Q: Idade (\*)

Type: number

A: number (min: 18 / max: 110 / step: 1)

Q: Sexo (\*)

Type: choice

A: one of the following:

|        |    |                  |
|--------|----|------------------|
| male   | => | <i>Masculino</i> |
| female | => | <i>Feminino</i>  |

Q: Estado Civil (\*)

Type: choice

A: one of the following:

|                   |    |                          |
|-------------------|----|--------------------------|
| Casado(a)         | => | <i>Casado(a)</i>         |
| Solteiro(o)       | => | <i>Solteiro(o)</i>       |
| Vive_maritalmente | => | <i>Vive maritalmente</i> |
| Divorciado(a)     | => | <i>Divorciado(a)</i>     |
| Viúvo(a)          | => | <i>Viúvo(a)</i>          |

Q: Afiliação Religiosa (\*)

Type: choice

A: one of the following:

|              |    |                     |
|--------------|----|---------------------|
| Muçulmana    | => | <i>Muçulmana</i>    |
| Zione        | => | <i>Zione</i>        |
| Cristã       | => | <i>Cristã</i>       |
| Sem_religião | => | <i>Sem religião</i> |
| Outra        | => | <i>Outra</i>        |

Q: Qual é a sua ocupação? (\*)

Type: choice

A: one of the following:

|             |    |                               |
|-------------|----|-------------------------------|
| Estudante   | => | <i>Estudante</i>              |
| Trabalhador | => | <i>Trabalhador</i>            |
| Outro       | => | <i>Outro,<br/>especificar</i> |

**Q: Especificar (\*)**

Type:  
text

A: text input

Visible if

|                        |                     |
|------------------------|---------------------|
| Q:                     | A:                  |
| Qual é a sua ocupação? | - value =><br>Outro |

**Q: Se for estudante, por favor selecciona o seu nível de escolaridade (\*)**

Type: choice

A: one of the following:

|                             |    |                                    |
|-----------------------------|----|------------------------------------|
| Primário                    | => | <i>Primário</i>                    |
| Secundário                  | => | <i>Secundário</i>                  |
| Graduado universitária      | => | <i>Graduado universitária</i>      |
| Pós-graduação universitária | => | <i>Pós-graduação universitária</i> |

**Q: Se for trabalhador, por favor selecciona o seu sector (\*)**

Type: choice

A: one of the following:

|                                |    |                                       |
|--------------------------------|----|---------------------------------------|
| Sector_de_Educação             | => | <i>Sector de Educação</i>             |
| Sector_de_Saúde                | => | <i>Sector de Saúde</i>                |
| Sector_de_Agricultura          | => | <i>Sector de Agricultura</i>          |
| Sector_das_Pescas              | => | <i>Sector das Pescas</i>              |
| Sector_de_Economia_e_Finanças  | => | <i>Sector de Economia e Finanças</i>  |
| Sector_de_Indústria_e_Comércio | => | <i>Sector de Indústria e Comércio</i> |
| Sector_Privado                 | => | <i>Sector Privado</i>                 |
| Outro                          | => | <i>Outro</i>                          |

**Q: Com quem você mora actualmente na mesma casa? (\*)**

Type: choice\_multiple

A: multiple answers possible:

|            |    |                   |
|------------|----|-------------------|
| Pai        | => | <i>Pai</i>        |
| Mãe        | => | <i>Mãe</i>        |
| Esposo_(a) | => | <i>Esposo (a)</i> |
| Filhos     | => | <i>Filhos</i>     |

|                       |    |                              |
|-----------------------|----|------------------------------|
| Tia(a)                | => | <i>Tia(a)</i>                |
| Irmão(a)              | => | <i>Irmão(a)</i>              |
| Cunhado(a)            | => | <i>Cunhado(a)</i>            |
| Sogro(a)              | => | <i>Sogro(a)</i>              |
| Sobrinho(a)           | => | <i>Sobrinho(a)</i>           |
| Trabalhador_domestico | => | <i>Trabalhador doméstico</i> |
| Sozinho               | => | <i>Sozinho</i>               |

Q: Selecione o número de pessoas em cada categoria de idade. (\*)

Type: choice\_scale

A: 60+18 a 59 anos12 a 17 anosMenores de 12 Anos

|    |    |           |
|----|----|-----------|
| 0  | => | <i>0</i>  |
| 1  | => | <i>1</i>  |
| 2  | => | <i>2</i>  |
| 3  | => | <i>3</i>  |
| 4  | => | <i>4</i>  |
| 5  | => | <i>5</i>  |
| 6  | => | <i>6</i>  |
| 7  | => | <i>7</i>  |
| 8  | => | <i>8</i>  |
| 9  | => | <i>9</i>  |
| 10 | => | <i>10</i> |

Q: Qual das seguintes categorias descreve melhor sua situação socioeconómica actual considerando o valor mensal de referencia de 30 mil meticais? (\*)

Type: choice

A: one of the following:

|                                          |    |                                                 |
|------------------------------------------|----|-------------------------------------------------|
| muito_baixa_em_relação_a_30_mil_meticais | => | <i>muito baixa em relação a 30 mil meticais</i> |
| baixa_em_relação_a_30_mil_meticais       | => | <i>baixa em relação a 30 mil meticais</i>       |
| em_torno_de_30_mil_meticais              | => | <i>em torno de 30 mil meticais</i>              |
| acima_de_30_mil_meticais                 | => | <i>acima de 30 mil meticais</i>                 |
| Muito_acima_de_30_mil_meticais           | => | <i>Muito acima de 30 mil meticais</i>           |
| Não_tenho_rendimento                     | => | <i>Não tenho rendimento</i>                     |

## SAÚDE E HISTÓRIA DO COVID-19

Q: Já ouviu falar do coronavírus/covid-19? (\*)

Type: choice

A: one of the following:

|     |    |            |
|-----|----|------------|
| Sim | => | <i>Sim</i> |
| Não | => | <i>Não</i> |

Q: Quais são os sintomas mais comuns da covid-19 (o que ela faz/provoca)? (\*)

Type: choice\_multiple

A: multiple answers possible:

|                          |    |                                 |
|--------------------------|----|---------------------------------|
| Febres                   | => | <i>Febres</i>                   |
| Dor_de_Cabeça            | => | <i>Dor de Cabeça</i>            |
| Dores_nas_articulações   | => | <i>Dores nas articulações</i>   |
| Dificuldades_em_respirar | => | <i>Dificuldades em respirar</i> |
| Tosse_seca               | => | <i>Tosse seca</i>               |
| Cansaço                  | => | <i>Cansaço</i>                  |
| Outros                   | => | <i>Outros</i>                   |

Visible if

|                                         |                |
|-----------------------------------------|----------------|
| Q:                                      | A:             |
| Já ouviu falar do coronavírus/covid-19? | - value => Sim |

Q: Como pode se contrair a covid-19? (\*)

Type: choice\_multiple

A: multiple answers possible:

|                      |    |                             |
|----------------------|----|-----------------------------|
| Abraço               | => | <i>Abraço</i>               |
| Beijo                | => | <i>Beijo</i>                |
| Aperto_de_mão        | => | <i>Aperto de mão</i>        |
| Ficar_em_aglomerados | => | <i>Ficar em aglomerados</i> |
| Outros               | => | <i>Outros</i>               |

Visible if

|                                         |                |
|-----------------------------------------|----------------|
| Q:                                      | A:             |
| Já ouviu falar do coronavírus/covid-19? | - value => Sim |

Q: Desde o início da pandemia você testou para covid-19? (\*)

Type: choice

A: one of the following:

|     |    |            |
|-----|----|------------|
| Sim | => | <i>Sim</i> |
| Não | => | <i>Não</i> |

Visible if

|                                         |                |
|-----------------------------------------|----------------|
| Q:                                      | A:             |
| Já ouviu falar do coronavírus/covid-19? | - value => Sim |

Q: Se sim, qual foi o resultado do seu estado de saúde (\*)

Type: choice

A: one of the following:

|                                    |    |                                           |
|------------------------------------|----|-------------------------------------------|
| Eu_fui_testado_positivo            | => | <i>Eu fui testado positivo</i>            |
| Eu_fui_testado_negativo            | => | <i>Eu fui testado negativo</i>            |
| Não_sei_os_resultados_do_meu_teste | => | <i>Não sei os resultados do meu teste</i> |

Visible if

|                                                       |                   |
|-------------------------------------------------------|-------------------|
| Q:                                                    | A:                |
| Desde o início da pandemia você testou para covid-19? | - value =><br>Sim |
| Já ouviu falar do coronavírus/covid-19?               | - value =><br>Sim |

Q: Quanto você está preocupado / com medo de se tornar (re) infectado pelo coronavírus? (\*)

Type:  
choice\_scale

A: Em uma escala de 1 a 5

|   |    |                                   |
|---|----|-----------------------------------|
| 1 | => | <i>1=Nada preocupado</i>          |
| 2 | => | <i>2=Um pouco preocupado</i>      |
| 3 | => | <i>3=Moderadamente preocupado</i> |
| 4 | => | <i>4=Muito preocupado</i>         |
| 5 | => | <i>5=Extremamente preocupado</i>  |

Visible if

|                                         |                   |
|-----------------------------------------|-------------------|
| Q:                                      | A:                |
| Já ouviu falar do coronavírus/covid-19? | - value =><br>Sim |

Q: Você sofre das seguintes condições crônicas de saúde? (muitas respostas possíveis) (\*)

Type: choice\_multiple

A: multiple answers possible:

|                           |    |                                  |
|---------------------------|----|----------------------------------|
| Doença_cardíaca           | => | <i>Doença cardíaca</i>           |
| Hipertensão_(Tensão)      | => | <i>Hipertensão (Tensão)</i>      |
| Câncer                    | => | <i>Câncer</i>                    |
| HIV                       | => | <i>HIV</i>                       |
| Tuberculose               | => | <i>Tuberculose</i>               |
| Doenças_respiratórias     | => | <i>Doenças respiratórias</i>     |
| AVC                       | => | <i>AVC</i>                       |
| Não_sou_de_doença_crônica | => | <i>Não sou de doença crônica</i> |
| Outro                     | => | <i>Outro</i>                     |

Q: Nos últimos 7 dias, você implementou qual das medidas preventivas contra a COVID-19? (marque todas as respostas que se aplicam) (\*)

Type: choice\_multiple

A: multiple answers possible:

|                                          |    |                                                                                                  |
|------------------------------------------|----|--------------------------------------------------------------------------------------------------|
| Distanciamento_físico_de_pelo_menos_1,5m | => | <i>Distanciamento físico de pelo menos 1,5m</i>                                                  |
| Uso_máscara_facial                       | => | <i>Uso máscara facial</i>                                                                        |
| Higiene_das_mãos                         | => | <i>Higiene das mãos (lavagem regular das mãos com sabão ou álcool-gel para as mãos ou cinza)</i> |
| Etiqueta_da_tosse                        | => | <i>Etiqueta da tosse (cobrir a boca ao tossir ou espirrar)</i>                                   |
| • Nenhuma_das_opções_acima               | => | <i>Nenhuma das opções acima</i>                                                                  |

Nos últimos 15 dias, quanto sentiu os seguintes sintomas?

Q: Sintomas (\*)

Type:  
choice\_scale

A: Sentiu-se para baixo, deprimido ou sem esperança? Pouco interesse ou prazer em realizar tarefas/actividades? Não ser capaz de parar ou controlar as preocupações Sentiu-se nervoso, ansioso ou no limite/esgotado

|   |    |                                   |
|---|----|-----------------------------------|
| 1 | => | <i>1=De modo nenhum</i>           |
| 2 | => | <i>2=Poucos dias</i>              |
| 3 | => | <i>3=Menos da metade dos dias</i> |
| 4 | => | <i>4=Mais da metade dos dias</i>  |
| 5 | => | <i>5=Quase todos os dias</i>      |

## COVID-19 VACINAÇÃO

Q: Na sua opinião, alguém pode ser infectado com coronavírus após a recuperação de uma infecção anterior por COVID-19? (\*)

Type: choice

A: one of the following:

|            |    |                   |
|------------|----|-------------------|
| Sim        | => | <i>Sim</i>        |
| Não        | => | <i>Não</i>        |
| Eu não sei | => | <i>Eu não sei</i> |

Q: Na sua opinião, a infecção por COVID-19 pode ser prevenida pela vacina actualmente disponível em Moçambique? (\*)

Type: choice

A: one of the following:

|            |    |                   |
|------------|----|-------------------|
| Sim        | => | <i>Sim</i>        |
| Não        | => | <i>Não</i>        |
| Eu não sei | => | <i>Eu não sei</i> |

Q: No seu melhor conhecimento, há actualmente uma vacina eficaz contra covid-19 Mundo? (\*)

Type: choice

A: one of the following:

|            |    |                   |
|------------|----|-------------------|
| Sim        | => | <i>Sim</i>        |
| Não        | => | <i>Não</i>        |
| Eu não sei | => | <i>Eu não sei</i> |

Q: Você estaria disposto a ser administrado(a) alguma das vacinas existentes contra COVID-19? (\*)

Type: choice

A: one of the following:

|     |    |            |
|-----|----|------------|
| Sim | => | <i>Sim</i> |
| Não | => | <i>Não</i> |

Q: O que levaria em conta para ser administrado(a) a vacina contra Covid-19 ?(\*)

Type: choice

A: one of the following:

|                  |    |                         |
|------------------|----|-------------------------|
| Origem_da_vacina | => | <i>Origem da vacina</i> |
| Marca_da_Vacina  | => | <i>Marca da Vacina</i>  |
| Outros           | => | <i>Outros Aspectos</i>  |
| Nenhuma          | => | <i>Nenhuma</i>          |

Visible if

|                                                                                            |                |
|--------------------------------------------------------------------------------------------|----------------|
| Q:                                                                                         | A:             |
| Você estaria disposto a ser administrado(a) alguma das vacinas existentes contra COVID-19? | - value => Sim |

Q: Origem da vacina, aliste (\*)

Type: choice\_multiple

A: multiple answers possible:

|             |    |                                  |
|-------------|----|----------------------------------|
| Alemanhã    | => | <i>Alemanhã</i>                  |
| EUA         | => | <i>Estados Unidos da América</i> |
| Rússia      | => | <i>Rússia</i>                    |
| Reino_Unido | => | <i>Reino Unido</i>               |
| China       | => | <i>China</i>                     |
| Índia       | => | <i>Índia</i>                     |
| Não sei     | => | <i>Não sei</i>                   |

Visible if

|                                                                            |                             |
|----------------------------------------------------------------------------|-----------------------------|
| Q:                                                                         | A:                          |
| O que levaria em conta para ser administrado(a) a vacina contra Covid-19 ? | - value => Origem_da_vacina |

Q: Marca da vacina, aliste (\*)

Type: choice\_multiple

A: multiple answers possible:

|                              |    |                                                               |
|------------------------------|----|---------------------------------------------------------------|
| Pfizer-BioNTech              | => | <i>Pfizer-BioNTech fosun farma</i>                            |
| Moderna                      | => | <i>Moderna</i>                                                |
| Sputnik-V/Gameleya           | => | <i>Sputnik-V/Gameleya</i>                                     |
| ChAdOx1-S_nCov19_Astrazeneca | => | <i>ChAdOx1-S nCov19 da Astrazeneca-Universidade de Oxford</i> |
| CoronaVac_(Sinovac)          | => | <i>CoronaVac_(Sinovac)</i>                                    |
| CanSino                      | => | <i>CanSino</i>                                                |
| Johnson_&_Johnson            | => | <i>Johnson &amp; Johnson</i>                                  |
| Sinopharm                    | => | <i>Sinopharm</i>                                              |
| Bharat_Biotech               | => | <i>Bharat Biotech</i>                                         |
| Novavax_(NVX-CoV2373)        | => | <i>Novavax (NVX-CoV2373)</i>                                  |
| Anhui_Zhifei_Longcom         | => | <i>Anhui Zhifei Longcom - RBD-Dmer</i>                        |
| Não sei                      | => | <i>Não sei</i>                                                |

Visible if

|                                                                            |                            |
|----------------------------------------------------------------------------|----------------------------|
| Q:                                                                         | A:                         |
| O que levaria em conta para ser administrado(a) a vacina contra Covid-19 ? | - value => Marca_da_Vacina |

Q: Eficácia na prevenção da infecção (\*)

Type: choice\_scale

A: Se for pelo menos 50% a 60% eficaz na prevenção da infecçãoSe for pelo menos 60% a 70% eficaz na prevenção da infecçãoSe for pelo menos 70% a 80% a eficaz na prevenção da infecçãoSe for pelo menos 80% a 90% eficaz na prevenção da infecçãoSe for pelo menos 90%+ eficaz na prevenção da infecção

|   |    |                            |
|---|----|----------------------------|
| 1 | => | <i>1=Sim</i>               |
| 2 | => | <i>2=Não</i>               |
| 3 | => | <i>3=Não Tenho Opinião</i> |

Visible if

|                                                                                            |                |
|--------------------------------------------------------------------------------------------|----------------|
| Q:                                                                                         | A:             |
| Você estaria disposto a ser administrado(a) alguma das vacinas existentes contra COVID-19? | - value => Sim |

Q: Qual seria a técnica de vacinação da sua preferência (\*)

Type: choice

A: one of the following:

|             |    |                    |
|-------------|----|--------------------|
| Seringas    | => | <i>Seringas</i>    |
| Vacina_Oral | => | <i>Vacina Oral</i> |

Visible if

|                                                                                            |                |
|--------------------------------------------------------------------------------------------|----------------|
| Q:                                                                                         | A:             |
| Você estaria disposto a ser administrado(a) alguma das vacinas existentes contra COVID-19? | - value => Sim |



Q: Seringas Porquê? (\*)

Type: choice\_multiple

A: multiple answers possible:

|           |    |                  |
|-----------|----|------------------|
| Segura    | => | <i>Segura</i>    |
| Eficiente | => | <i>Eficiente</i> |
| Outro     | => | <i>Outro</i>     |

Visible if

|                                                      |                        |
|------------------------------------------------------|------------------------|
| Q:                                                   | A:                     |
| Qual seria a técnica de vacinação da sua preferência | - value =><br>Seringas |

Q: Vacina Oral Porquê? (\*)

Type: choice\_multiple

A: multiple answers possible:

|           |    |                  |
|-----------|----|------------------|
| Segura    | => | <i>Segura</i>    |
| Eficiente | => | <i>Eficiente</i> |
| Outro     | => | <i>Outro</i>     |

Visible if

|                                                      |                           |
|------------------------------------------------------|---------------------------|
| Q:                                                   | A:                        |
| Qual seria a técnica de vacinação da sua preferência | - value =><br>Vacina_Oral |

Q: Quais são os possíveis motivos pelo qual você hesitaria em tomar a vacina de COVID-19? (muitas respostas possíveis) (\*)

Type: choice\_multiple

A: multiple answers possible:

|                                     |    |                                                                                             |
|-------------------------------------|----|---------------------------------------------------------------------------------------------|
| COVID-19_Nao_Existente              | => | <i>Eu não acho que COVID-19 existe</i>                                                      |
| Nao_Eficaz                          | => | <i>Eu acho que a vacina não é eficaz</i>                                                    |
| Prejudica                           | => | <i>Eu acho que a vacina foi feita para nos prejudicar</i>                                   |
| Medo_de_Efeitos_Colaterais          | => | <i>Estou com medo dos efeitos colaterais da vacina</i>                                      |
| Corpo_Naturalmente_Forte            | => | <i>Meu corpo é naturalmente forte, não preciso de uma vacina para lutar contra COVID-19</i> |
| Doenças_respiratórias               | => | <i>Doenças respiratórias</i>                                                                |
| Tinha_COVID_Sou_Imune               | => | <i>Eu já tinha COVID-19, então acho que sou imune à doença</i>                              |
| A_COVID_terminou_na_minha_Provincia | => | <i>A pandemia COVID-19 terminou na minha província, não há necessidade de vacina agora</i>  |
| Nenhuma_das_opções_acima            | => | <i>Nenhuma das opções acima</i>                                                             |
| Outros                              | => | <i>Outros Motivos</i>                                                                       |

Q: Importancia da Vacinação (\*)

Type:  
choice\_scale

A: Vacinar-se contra COVID-19, é importante para proteger a sua saúde? Vacinar-se contra COVID-19, é algo importante para proteger outras pessoas na sua comunidade?

|   |    |                            |
|---|----|----------------------------|
| 1 | => | 1=Nada importante          |
| 2 | => | 2=Um pouco importante      |
| 3 | => | 3=Moderadamente importante |
| 4 | => | 4=Muito importante         |
| 5 | => | 5=Extremamente importante  |

Q: Experiências passadas com vacinação? (\*)

Type: choice

A: one of the following:

|          |    |          |
|----------|----|----------|
| Positiva | => | Positiva |
| Negativa | => | Negativa |

Q: Positiva Porquê? (\*)

Type: choice\_multiple

A: multiple answers possible:

|                                 |    |                                 |
|---------------------------------|----|---------------------------------|
| Qualidade_do_Provedor           | => | Qualidade do Provedor           |
| Organização_do_Servico_de_Saude | => | Organização do Servico de Saude |
| Segurança_da_vacina             | => | Segurança da vacina             |
| Eficácia_da_vacina              | => | Eficácia da vacina              |
| Outros                          | => | Outros, especifique             |
| Sem_Opinião                     | => | Sem Opinião                     |

Visible if

|                                      |                     |
|--------------------------------------|---------------------|
| Q:                                   | A:                  |
| Experiências passadas com vacinação? | - value => Positiva |

Q: Negativa Porquê? (\*)

Type: choice\_multiple

A: multiple answers possible:

|                                 |    |                                 |
|---------------------------------|----|---------------------------------|
| Qualidade_do_Provedor           | => | Qualidade do Provedor           |
| Organização_do_Servico_de_Saude | => | Organização do Servico de Saude |
| Segurança_da_vacina             | => | Segurança da vacina             |
| Eficácia_da_vacina              | => | Eficácia da vacina              |
| Outros                          | => | Outros                          |
| Sem_Opinião                     | => | Sem Opinião                     |

Visible if

|                                      |                     |
|--------------------------------------|---------------------|
| Q:                                   | A:                  |
| Experiências passadas com vacinação? | - value => Negativa |

Q: Você tem filhos? (\*)

Type: choice

A: one of the following:

|     |    |            |
|-----|----|------------|
| Sim | => | <i>Sim</i> |
| Não | => | <i>Não</i> |

Q: Número de filhos (\*)

Type:  
text

A: text input

Visible if

|                  |                |
|------------------|----------------|
| Q:               | A:             |
| Você tem filhos? | - value => Sim |

Q: Você aceitaria que o seu filho recebesse a vacina? (\*)

Type: choice

A: one of the following:

|     |    |            |
|-----|----|------------|
| Sim | => | <i>Sim</i> |
| Não | => | <i>Não</i> |

Visible if

|                  |                |
|------------------|----------------|
| Q:               | A:             |
| Você tem filhos? | - value => Sim |

Q: (Se não), liste as razões que teria para que o seu filho não receba essa vacina? (\*)

Type: choice\_multiple

A: multiple answers possible:

|                                                       |    |                                                              |
|-------------------------------------------------------|----|--------------------------------------------------------------|
| Não_é_necessária                                      | => | <i>Não é necessária</i>                                      |
| Não_funciona                                          | => | <i>Não funciona</i>                                          |
| Membros_da_família_ou_ami_os_aconselharam_contra_isso | => | <i>Membros da família ou amigos aconselharam contra isso</i> |
| Não_é_adequado_para_crianças                          | => | <i>Não é adequado para crianças</i>                          |
| Medo_dos_efeitos_secundários                          | => | <i>Medo dos efeitos secundários</i>                          |
| Eu_não_confio_nos_fabricantes                         | => | <i>Eu não confio nos fabricantes</i>                         |
| Outros                                                | => | <i>Outros</i>                                                |

Visible if

|                                                    |                   |
|----------------------------------------------------|-------------------|
| Q:                                                 | A:                |
| Você aceitaria que o seu filho recebesse a vacina? | - value =><br>Não |

Q: Compreendo perfeitamente sobre o que é este estudo e concordo em participar. Todas as informações que forneço podem ser usadas pelos pesquisadores para compreender melhor sobre as medidas preventivas para o coronavírus no meu país. (\*)

Type: checkbox

A: checkbox
